# Supplementary material for: Characterization of Clinical Isolates of Talaromyces marneffei and Related Species, California, USA
Source: PubMed Central journal article supplement (PMC6711226; doi:10.3201/eid2509.190380), 2019-09
Supplement: 19-0380-Techapp-s1.pdf [file 19-0380-Techapp-s1.pdf]

# Clinical Isolates of *Talaromyces marneffei* and Related Species, California, USA

## Appendix

**Appendix Table 1.** Source of *Talaromyces* isolates

| Isolate ID | Culture source                | Age/sex | Species              |
|------------|-------------------------------|---------|----------------------|
| MDL17022   | Blood sample                  | 37/M    | <i>T. marneffei</i>  |
| MDL17026   | Sputum sample                 | 53 /F   | <i>T. atrovireus</i> |
| MDL17144   | Ear                           | 9 /M    | <i>T. atrovireus</i> |
| MDL17164   | Nail                          | 85/M    | <i>T. atrovireus</i> |
| MDL18026   | Skin tissue                   | 36/M    | <i>T. marneffei</i>  |
| MDL18054   | Sputum                        | 52/F    | <i>T. stollii</i>    |
| MDL18070   | Bronchial wash                | 73/F    | <i>T. atrovireus</i> |
| MDL18102   | Bronchoalveolar lavage sample | 59/F    | <i>T. coalescens</i> |
| MDL18159   | Bronchoscopy sample           | 72/F    | <i>T. australis</i>  |
| MDL18167   | Bronchial wash                | 63/M    | <i>T. islandicus</i> |

**Appendix Table 2.** Identification of *Talaromyces* isolates by matrix-assisted laser desorption/ionization–time of flight mass spectrometry\*

| Isolate  | Species ID by sequencing | Bruker and NIH database† |            | Bruker, NIH, and MDL database |            |
|----------|--------------------------|--------------------------|------------|-------------------------------|------------|
|          |                          | Best match               | Best score | Best match                    | Best score |
| MDL17022 | <i>T. marneffei</i>      | <i>T. marneffei</i>      | 1.22       | <i>T. marneffei</i>           | 2.31       |
| MDL17026 | <i>T. atrovireus</i>     | No ID                    | –          | <i>T. atrovireus</i>          | 2.18       |
| MDL17144 | <i>T. atrovireus</i>     | No ID                    | –          | <i>T. atrovireus</i>          | 2.30       |
| MDL17164 | <i>T. atrovireus</i>     | No ID                    | –          | <i>T. atrovireus</i>          | 2.57       |
| MDL18026 | <i>T. marneffei</i>      | No ID                    | –          | <i>T. marneffei</i>           | 2.17       |
| MDL18054 | <i>T. stollii</i>        | <i>T. ruber</i>          | 1.78       | <i>T. stollii</i>             | 2.36       |
| MDL18070 | <i>T. atrovireus</i>     | No ID                    | –          | <i>T. atrovireus</i>          | 2.23       |
| MDL18102 | <i>T. coalescens</i>     | No ID                    | –          | <i>T. coalescens</i>          | 2.02       |
| MDL18159 | <i>T. australis</i>      | <i>Talaromyces spp.</i>  | 1.38       | <i>T. australis</i>           | 2.31       |
| MDL18167 | <i>T. islandicus</i>     | No ID                    | –          | <i>T. islandicus</i>          | 2.02       |

\*ID, identification; MDL, Microbial Diseases Laboratory, California Department of Public Health; NIH, National Institutes of Health. Dash indicates .  
 †Bruker Filamentous Fungi Library 2.0 and NIH Mold Library (Lau AF, Drake SK, Calhoun LB, Henderson CM, Zelazny AM. Development of a clinically comprehensive database and a simple procedure for identification of molds from solid media by matrix-assisted laser desorption ionization-time of flight mass spectrometry. J Clin Microbiol. 2013;51:828–34).

**Appendix Table 3.** Growth study of *Talaromyces* isolates\*

| Isolate ID | Species ID           | 37°C growth on SDA | Colony characteristics on SDA 30°C |                                          | Red soluble pigment† |    |       |   |     |   |       |   |
|------------|----------------------|--------------------|------------------------------------|------------------------------------------|----------------------|----|-------|---|-----|---|-------|---|
|            |                      |                    |                                    |                                          | 3 d                  |    |       |   | 7 d |   |       |   |
|            |                      |                    |                                    |                                          | SDA                  |    | E-SDA |   | SDA |   | E-SDA |   |
| 25         | 30                   | 25                 | 30                                 | 25                                       | 30                   | 25 | 30    |   |     |   |       |   |
| MDL17022   | <i>T. marneffei</i>  | +                  | Yellowish white, velvety           | Yellowish green, reddish brown, floccose | +                    | +  | +     | + | +   | + | +     | + |
| MDL17026   | <i>T. atrovireus</i> | +                  | Blue green, felty                  | Blue green, floccose, white center       | –                    | –  | –     | – | –   | – | –     | – |
| MDL17144   | <i>T. atrovireus</i> | +                  | White, downy                       | Dark blue green, velvety, red center     | –                    | –  | –     | – | –   | + | +     | + |
| MDL17164   | <i>T. atrovireus</i> | +                  | White, downy                       | Dark blue green, floccose, yellow center | –                    | –  | –     | – | –   | + | –     | – |
| MDL18026   | <i>T. marneffei</i>  | +                  | Yellowish green, powdery           | Yellowish green, pinkish brown, floccose | +                    | +  | +     | + | +   | + | +     | + |
| MDL18054   | <i>T. stollii</i>    | +                  | White, floccose                    | White, floccose                          | –                    | –  | +     | – | +   | – | +     | – |
| MDL18070   | <i>T. atrovireus</i> | +                  | White, downy                       | Blue green, reddish brown, floccose      | –                    | –  | –     | – | +   | + | +     | – |
| MDL18102   | <i>T. coalescens</i> | –                  | Whitish green, downy               | Whitish-green, floccose                  | –                    | –  | –     | – | –   | – | –     | – |

| Isolate ID | Species ID           | 37°C growth on SDA | Colony characteristics on SDA 30°C |                                | Red soluble pigment† |       |     |       |     |       |     |       |
|------------|----------------------|--------------------|------------------------------------|--------------------------------|----------------------|-------|-----|-------|-----|-------|-----|-------|
|            |                      |                    |                                    |                                | 3 d                  |       | 7 d |       | 3 d |       | 7 d |       |
|            |                      |                    |                                    |                                | SDA                  | E-SDA | SDA | E-SDA | SDA | E-SDA | SDA | E-SDA |
| MDL18159   | <i>T. australis</i>  | +                  | White, red, floccose               | Red, floccose                  | -                    | +     | +   | +     | +   | +     | +   |       |
| MDL18167   | <i>T. islandicus</i> | +                  | Green, orange, felty               | Dark green, felty, orange edge | -                    | -     | -   | -     | -‡  | -‡    | -‡  |       |

\*E-SDA, Sabouraud dextrose agar, Emmons; SDA, Sabouraud dextrose agar; +, positive ; -, negative.

†Red soluble pigment producing was observed at 25°C and 30°C.

‡*T. islandicus* produces yellow-orange soluble pigment.

**Appendix Table 4.** *Talaromyces* isolate reference sequences and their GenBank accession numbers\*

| Species                     | Collection no. | ITS          | BenA         | RPB1         |
|-----------------------------|----------------|--------------|--------------|--------------|
| <i>T. allahabadensis</i>    | CBS 304.63     | KF984873     | KF984614     | JN680309     |
| <i>T. amestolkiae</i>       | CBS 132696     | JX315660     | JX315623     | JX315679     |
| <i>T. apiculatus</i>        | CBS 312.59     | JN899375     | KF741916     | JN680293     |
| <i>T. assiutensis</i>       | CBS 147.78     | JN899323     | KJ865720     | JN680275     |
| <i>T. atroroseus</i>        | CBS 364.48     | KF114740     | KF114790     | KF114750     |
| <i>T. convolutus</i>        | CBS 100537     | JN899330     | KF114773     | JN121553     |
| <i>T. dendriticus</i>       | CBS 660.80     | JN899339     | JX091391     | JN121714     |
| <i>T. dextii</i>            | CBS 412.89     | JN899327     | JX494306     | JN680306     |
| <i>T. flavus</i>            | CBS 310.38     | JN899360     | JX494302     | JN121639     |
| <i>T. funiculosus</i>       | CBS 272.86     | JN899377     | JX091383     | JN680288     |
| <i>T. helicus</i>           | CBS 335.48     | JN899359     | KJ865725     | JN680300     |
| <i>T. islandicus</i>        | CBS 338.48     | KF984885     | KF984655     | JN121648     |
| <i>T. marneffeii</i>        | ATCC 18224     | NW_002196683 | NW_002196666 | NW_002196662 |
| <i>T. palmae</i>            | CBS 442.88     | JN899396     | HQ156947     | JN680308     |
| <i>T. pittii</i>            | CBS 139.84     | JN899325     | KJ865728     | JN680274     |
| <i>T. proteolyticus</i>     | CBS 303.67     | JN899387     | KJ865729     | JN680292     |
| <i>T. purpureus</i>         | CBS 475.71     | JN899328     | GU385739     | JN121687     |
| <i>T. stollii</i>           | CBS 408.93     | JX315674     | JX315633     | JX315693     |
| <i>T. trachyspermus</i>     | CBS 373.48     | JN899354     | KF114803     | JN121664     |
| <i>T. unicus</i>            | CBS 100535     | JN899336     | KJ865735     | JN680324     |
| <i>T. varians</i>           | CBS 386.48     | JN899368     | KJ865731     | JN680305     |
| <i>T. viridulus</i>         | CBS 252.87     | JN899314     | JX091385     | JN680284     |
| <i>Trichocomma paradoxa</i> | CBS 788.83     | JN899398     | KF984556     | JN121718     |

\*ATCC, American Type Culture Collection; BenA:  $\beta$ -tubulin gene; CBS, Westerdijk Fungal Biodiversity Institute, Utrecht, the Netherlands; ITS, internal transcribed spacer; RPB1, RNA polymerase II largest subunit gene.
